# Supplementary material for: Removal of a reactive dye and hexavalent chromium by a reusable bacteria attached electrospun nanofibrous web
Source: Royal Society of Chemistry journal article supplement (doi:10.1039/c5ra15601g), 2015-01-01
Supplement: c5ra15601g1.pdf [file c5ra15601g1.pdf]

## Supplementary Information

### Removal of Reactive Dye and Hexavalent Chromium by Reusable Bacteria Attached Electrospun Nanofibrous Web

Nalan Oya San Keskin<sup>\*abc</sup>, Asli Celebioglu<sup>cd</sup>, Omer Faruk Sarioglu<sup>cd</sup>, Alper Devrim Ozkan<sup>cd</sup>, Tamer Uyar<sup>\*cd</sup> and Turgay Tekinay<sup>\*be</sup>

<sup>a</sup> Polatli Science and Literature Faculty, Biology Department, Gazi University, Ankara 06900, Turkey

<sup>b</sup> Life Sciences Application and Research Center, Gazi University, Ankara 06830, Turkey

<sup>c</sup> UNAM-National Nanotechnology Research Center, Bilkent University, Ankara 06800, Turkey

<sup>d</sup> Institute of Materials Science and Nanotechnology, Bilkent University, 06800 Ankara, Turkey

<sup>e</sup> Faculty of Medicine, Department of Medical Biology and Genetics, Gazi University, Ankara 06560, Turkey

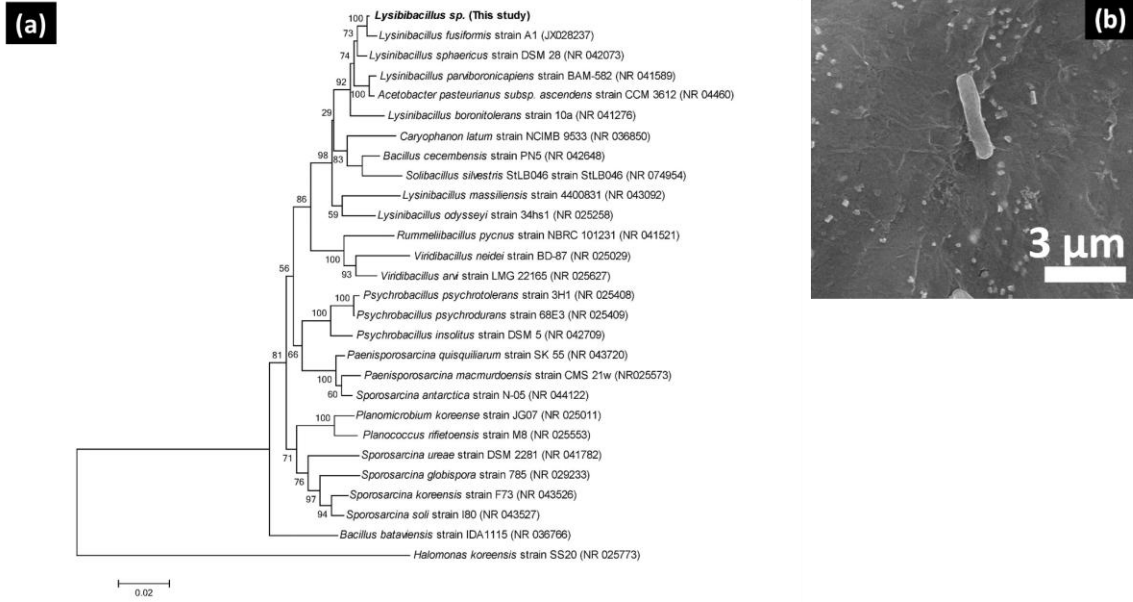

**Figure S1.** (a) Phylogenetic tree of the members of the genus *Lysinibacillus* sp., the strain NOSK and representatives of some other taxa based on 16S rRNA gene sequence comparisons (b) SEM micrograph of *Lysinibacillus* sp. NOSK.

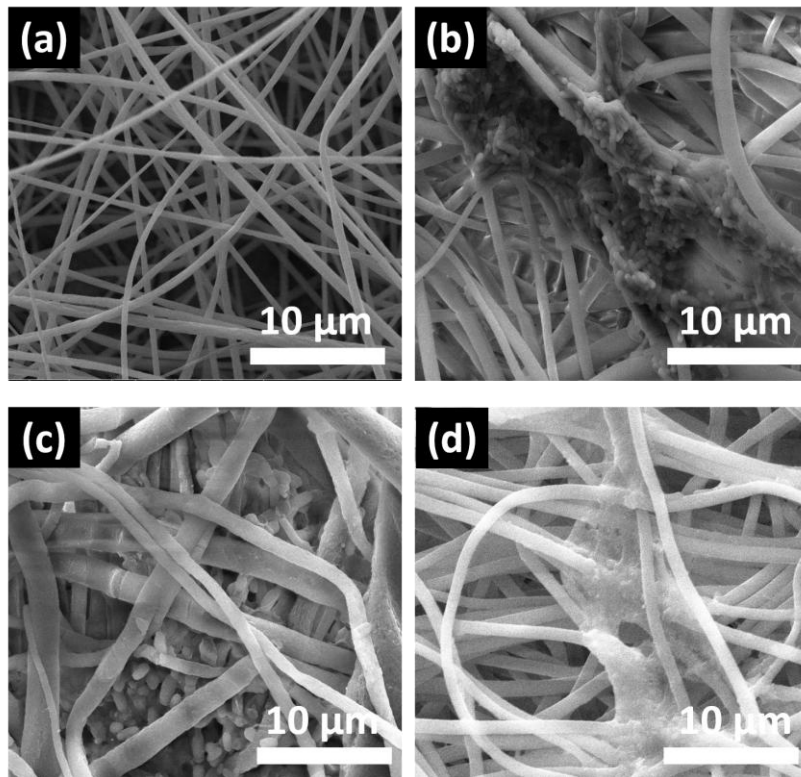

**Figure S2.** SEM images of PSU-NFW: (a) pristine PSU-NFW (b) after 24 h incubation, (b) after 7 days of incubation, and (c) after 15 days of incubation from the initiation of bacterial growth experiments in 50 mL liquid media (pH: 8.0; Temp:  $30\pm 1$  °C; stirring rate: 100 rpm).

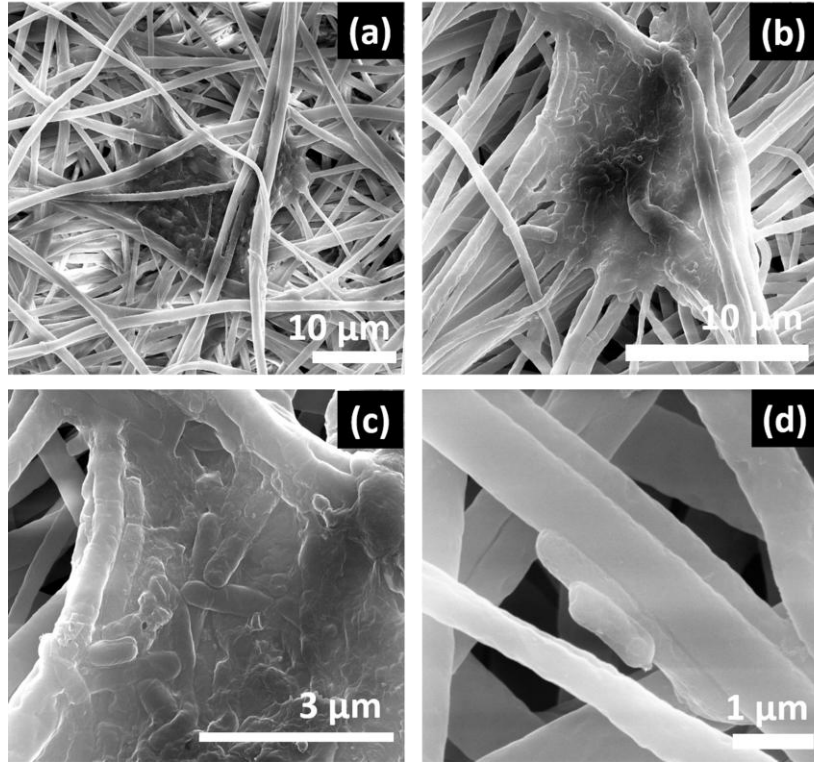

**Figure S3.** Representative SEM micrographs of the bacteria/PSU-NFW after the reusability tests (a) 5000 x magnification (b-c) 20.000 x magnification (d) 40.000 x magnification.

**Table S1.** Simultaneous effect of dye and Cr(VI) on bioaccumulation of pristine PSU-NFW and bacteria/PSU-NFW in the media containing 30 mg L<sup>-1</sup> of contaminants during the 24 h incubation period (pH: 8.0; Temp: 30±1 °C; stirring rate; 100 rpm).

| <b>Cr(VI)</b>                            |                | <b>Reactive Black 5</b>                  |                |
|------------------------------------------|----------------|------------------------------------------|----------------|
| <b>C<sub>0</sub> (mg L<sup>-1</sup>)</b> | <b>% Yield</b> | <b>C<sub>0</sub> (mg L<sup>-1</sup>)</b> | <b>% Yield</b> |
| 15.4 ± 0.9                               | 63 ± 0.9       | 30.9 ± 0.2                               | 91.8 ± 0.2     |
| 51.3 ± 2.3                               | 27.8 ± 0.4     | 30.4 ± 0.7                               | 90.6 ± 0.7     |
| 100.8 ± 0.97                             | 8.9 ± 2.3      | 30.2 ± 1.1                               | 82.7 ± 1.1     |
| 30.3 ± 0.35                              | 98.4 ± 0.9     | 15.2 ± 1.4                               | 70 ± 1.4       |
| 30.5 ± 0.42                              | 91.3 ± 0.4     | 50.3 ± 0.2                               | 66.1 ± 0.2     |
| 30.2 ± 0.45                              | 82.7 ± 0.6     | 100.6 ± 1.7                              | 56.5 ± 1.7     |

**Table S2.** Adsorption kinetics coefficients of bacteria/PSU-NFW for each isotherm model (L-F: generalized Langmuir-Freundlich).

| <b>Contaminant</b> | <b>Isotherm</b> | <b>Parameters</b> | <b>Values</b>           | <b>Ry<sup>2</sup> value</b> |       |
|--------------------|-----------------|-------------------|-------------------------|-----------------------------|-------|
| Cr(VI)             | Freundlich      | Kf                | 5.52                    | 0.972                       |       |
|                    |                 | 1/n               | 1.02 x 10 <sup>-6</sup> |                             |       |
|                    | Langmuir        | Q <sub>max</sub>  | 5.67                    | 0.995                       |       |
|                    |                 | b                 | 1.00                    |                             |       |
|                    | L-F             | Q <sub>max</sub>  | 5.67                    | 0.995                       |       |
|                    |                 | b                 | 1.00                    |                             |       |
|                    |                 | 1/n               | 1.00                    |                             |       |
|                    | Linear          | Kp                | 0.049                   | 0.769                       |       |
|                    | Toth            | Toth              | Q <sub>max</sub>        | 5.52                        | 0.973 |
|                    |                 |                   | b                       | 0.99                        |       |
| n                  |                 |                   | 4.99                    |                             |       |
|                    |                 |                   |                         |                             |       |
| RB5                | Freundlich      | Kf                | 4.66                    | 0.575                       |       |
|                    |                 | 1/n               | 0.59                    |                             |       |
|                    | Langmuir        | Q <sub>max</sub>  | 59.11                   | 0.670                       |       |
|                    |                 | b                 | 0.047                   |                             |       |
|                    | L-F             | Q <sub>max</sub>  | 59.21                   | 0.669                       |       |
|                    |                 | b                 | 0.047                   |                             |       |
|                    |                 | 1/n               | 1.00                    |                             |       |
|                    | Linear          | Kp                | 1.18                    | 0.490                       |       |
|                    | Toth            | Toth              | Q <sub>max</sub>        | 35.17                       | 0.877 |
|                    |                 |                   | b                       | 0.058                       |       |
| n                  |                 |                   | 5.00                    |                             |       |
|                    |                 |                   |                         |                             |       |

**Table 3.** The R<sup>2</sup> values of zero, first, second and third order plots for the removal of Cr(VI) or RB5 by bacteria/PSU-NFW.

| <b>Contaminant</b> | <b>Model</b> | <b>R<sup>2</sup> values</b> |
|--------------------|--------------|-----------------------------|
| Cr(VI)             | zero order   | 0.8687                      |
|                    | first order  | 0.9850                      |
|                    | second order | 0.7863                      |
|                    | third order  | 0.7258                      |
| RB5                | zero order   | 0.9594                      |
|                    | first order  | 0.8417                      |
|                    | second order | 0.7221                      |
|                    | third order  | 0.7182                      |
